# Supplementary material for: A light-switch for efficient decolorization of azo dye wastewater based on bacteria–semiconductor interaction
Source: Royal Society of Chemistry journal article supplement (doi:10.1039/d1en01092a), 2022-01-01
Supplement: d1en01092a1.pdf [file d1en01092a1.pdf]

## Supplementary Information

### **A light-switch for efficient decolorization of azo dye wastewater based on bacteria-semiconductors interaction**

Yimei Du <sup>b</sup>, Jianbo Guo <sup>a,b\*</sup>, Ya-Nan Hou <sup>b,c\*</sup>, Yuanyuan Song <sup>b</sup>, Caicai Lu <sup>b</sup>, Yi Han <sup>b</sup>, and Haibo Li

<sup>b</sup>

<sup>a</sup> School of Civil Engineering and Architecture, Taizhou University, Taizhou 318000, Zhejiang, China

<sup>b</sup> School of Environmental and Municipal Engineering, Tianjin Key Laboratory of Aquatic Science and Technology, Tianjin Chengjian University, Jinjing Road 26, Tianjin 300384, China

<sup>c</sup> National Technology Innovation Center of Synthetic Biology, Tianjin Institute of Industrial Biotechnology, Chinese Academy of Sciences, Tianjin 300308, China

\* Author for correspondence

Fax: +86-22-23085116; E-mail: [jianbguo@163.com](mailto:jianbguo@163.com) (Prof. Jianbo Guo)

[houyn2013@163.com](mailto:houyn2013@163.com) (Dr. Ya-Nan Hou)

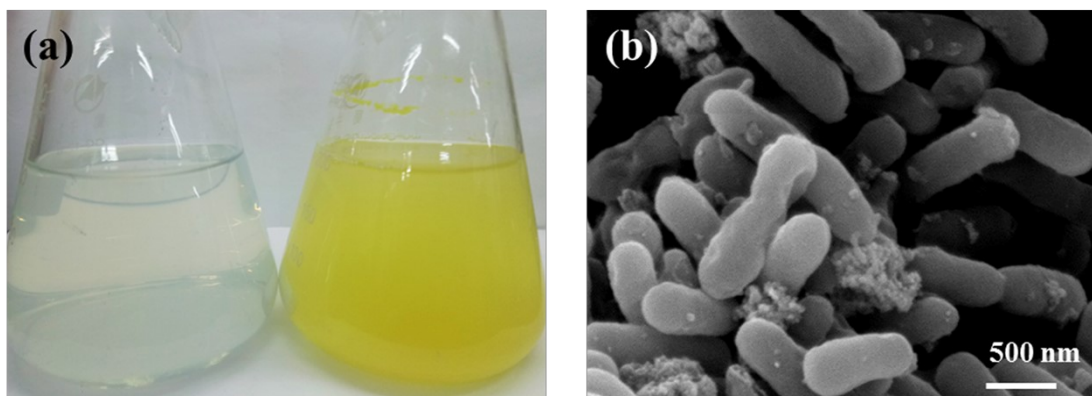

**Fig.S1.** (a) Appearances of chemical control without *S. oneidensis* MR-1 (left) and *S. oneidensis* MR-1/CdS suspensions (right). (b) SEM image of *S. oneidensis* MR-1/CdS.

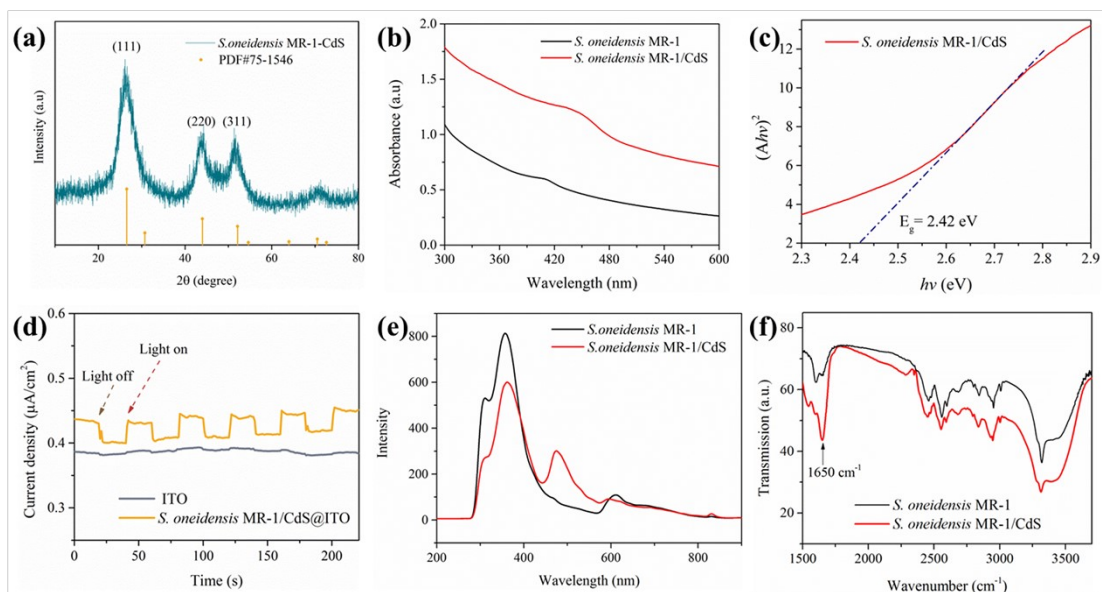

**Fig.S2.** (a) XRD pattern of *S. oneidensis* MR-1-CdS before decolorization reaction. (b) UV-vis spectrum of *S. oneidensis* MR-1/CdS. (c) Bandgap calculation of *S. oneidensis* MR-1/CdS based on Tauc plot. (d) I-t curves with a light on/off cycle. (e) Fluorescence spectra of *S. oneidensis* MR-1 and *S. oneidensis* MR-1/CdS. (f) FTIR spectra of *S. oneidensis* MR-1 and *S. oneidensis* MR-1/CdS.

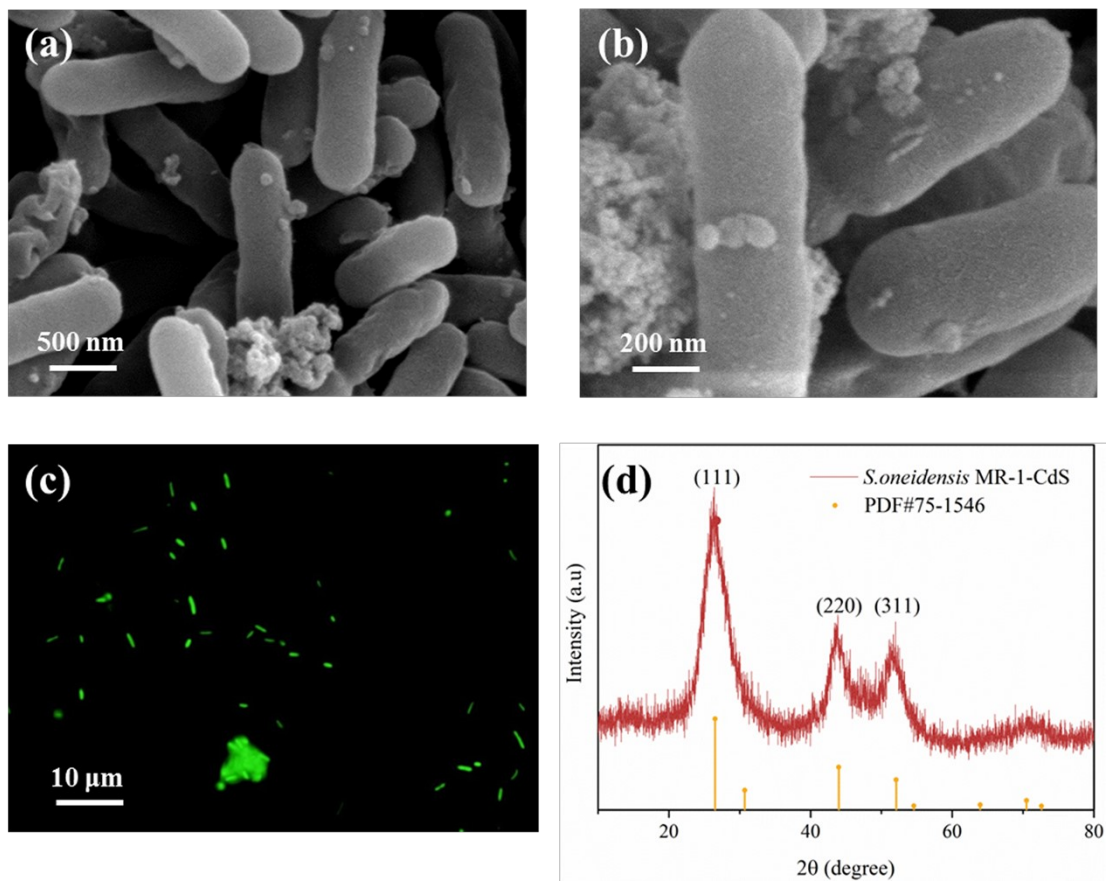

**Fig. S3.** (a, b) SEM images of *S. oneidensis* MR-1/CdS after decolorization reaction. (c) Fluorescence microscope image of *S. oneidensis* MR-1/CdS in live/dead cell viability assay after decolorization. (d) XRD pattern of *S. oneidensis* MR-1/CdS after decolorization reaction.

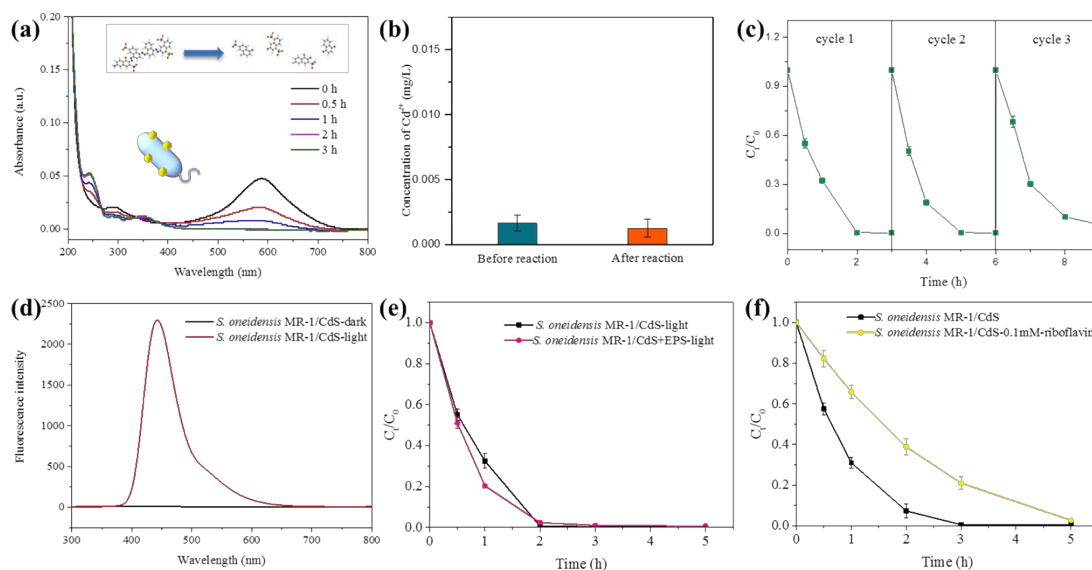

**Fig.S4.** (a) UV-vis spectra of DB71 decolorization process by *S. oneidensis* MR-1/CdS under LED irradiation. (b) The concentration of Cd<sup>2+</sup> in the solution before and after decolorization reaction. (c) DB71 decolorization stability in *S. oneidensis* MR-1/CdS under light irradiation in 3 cycles. (d) Fluorescence emission spectra of *S. oneidensis* MR-1/CdS supernatant after DB71 decolorization reaction (excitation wavelength is 365nm). (e) Effects of additional EPS on decolorization efficiency in *S. oneidensis* MR-1/CdS. (f) Effects of additional riboflavin on decolorization efficiency in *S. oneidensis* MR-1/CdS.
